# Supplementary material for: Effect of Zearalenone-Induced Ferroptosis on Mice Spermatogenesis
Source: MDPI journal article supplement (doi:10.3390/ani12213026), 2022-11-03
Supplement: s1 [file s1]

**Table S1.** CV values of MDA, T-GSH content, SOD activity, Fe<sup>3+</sup> and Fe<sup>2+</sup> relative content in each treatment group.

| CV                                            | Control | ZEA 30 | ZEA 30+<br>Fer-1 (0.5) | ZEA 30+<br>Fer-1 (1) | ZEA 30+<br>Fer-1 (1.5) |
|-----------------------------------------------|---------|--------|------------------------|----------------------|------------------------|
| MDA                                           | 0.67    | 0.54   | 0.28                   | 0.34                 | 0.53                   |
| T-GSH                                         | 0.15    | 0.07   | 0.05                   | 0.06                 | 0.14                   |
| SOD                                           | 0.08    | 0.06   | 0.18                   | 0.07                 | 0.03                   |
| Relative content<br>level of Fe <sup>3+</sup> | 0.10    | 0.08   | 0.07                   | 0.07                 | 0.15                   |
| Relative content<br>level of Fe <sup>2+</sup> | 0.06    | 0.03   | 0.03                   | 0.12                 | 0.10                   |

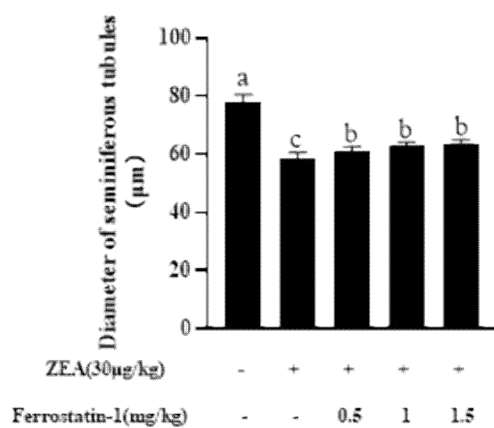

**Figure S1.** Change of diameter of seminiferous tubules in each treatment.

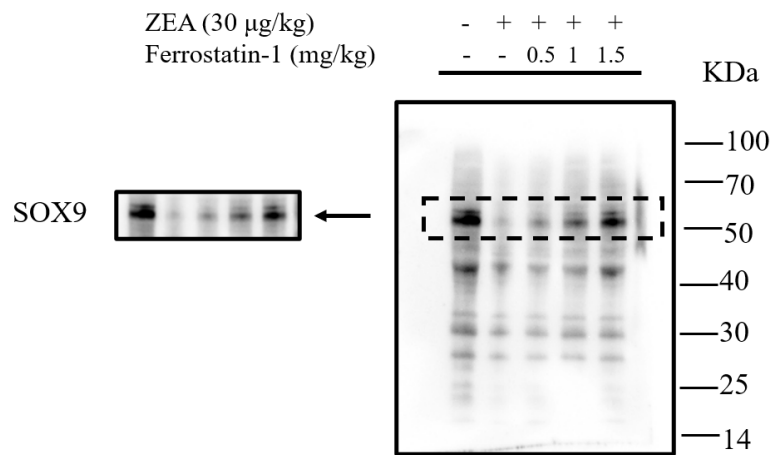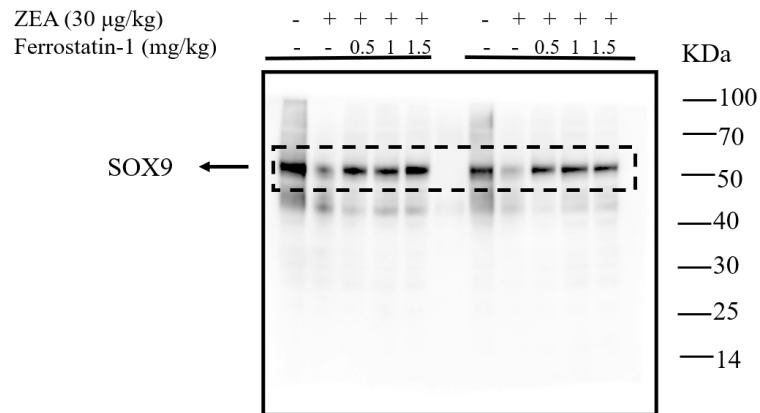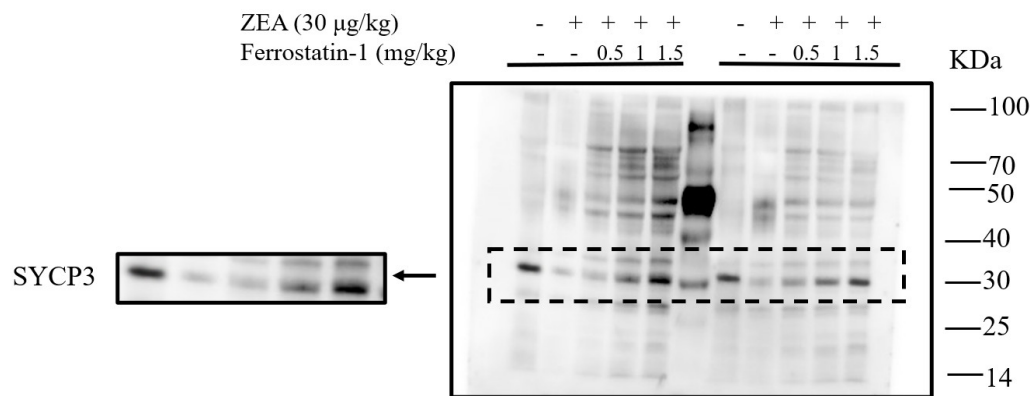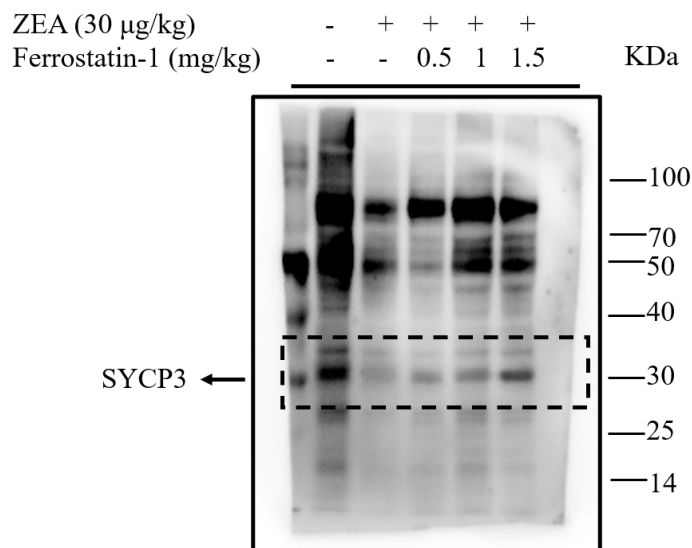

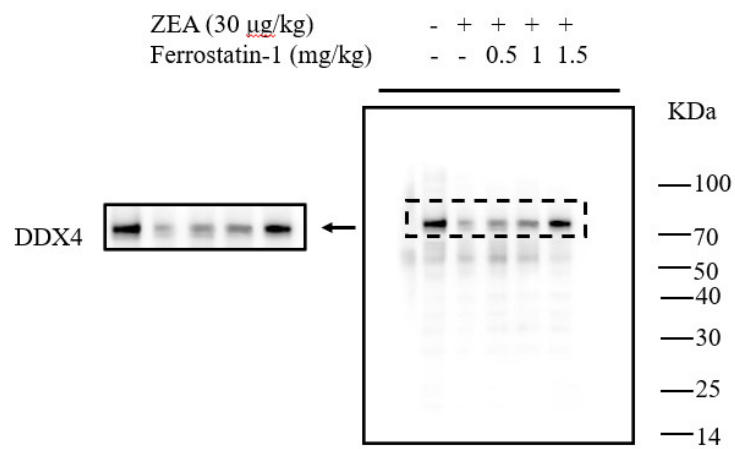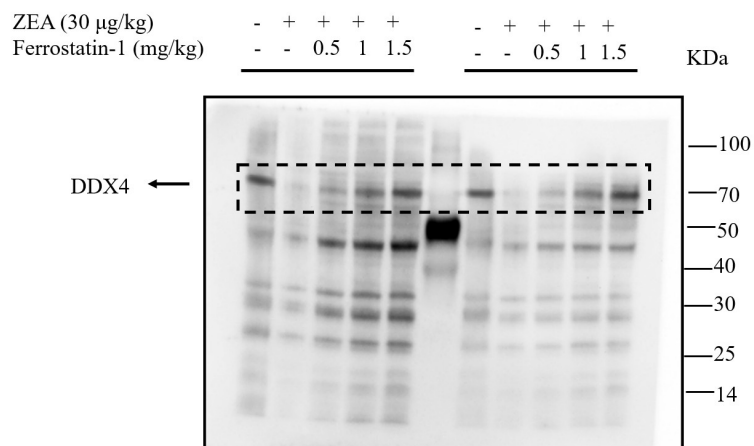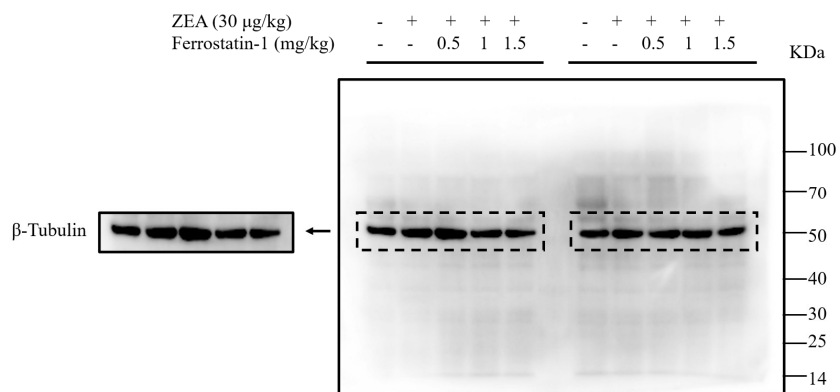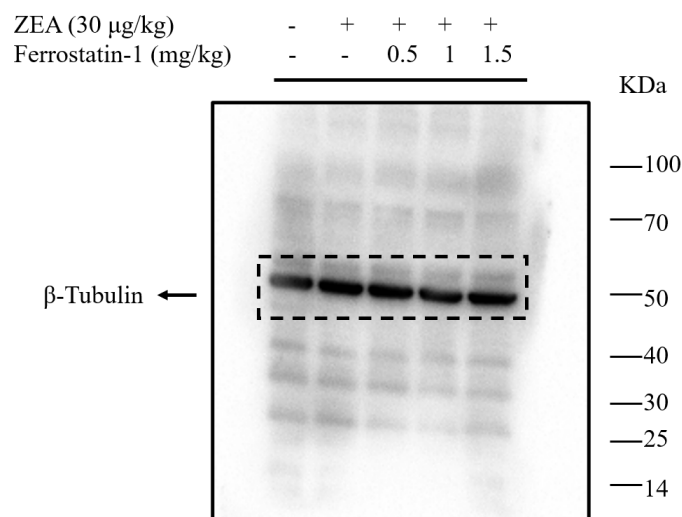

**Figure S2.** Expression changes of SOX9, SYCP3 and DDX4 proteins in testis of mice in each group.

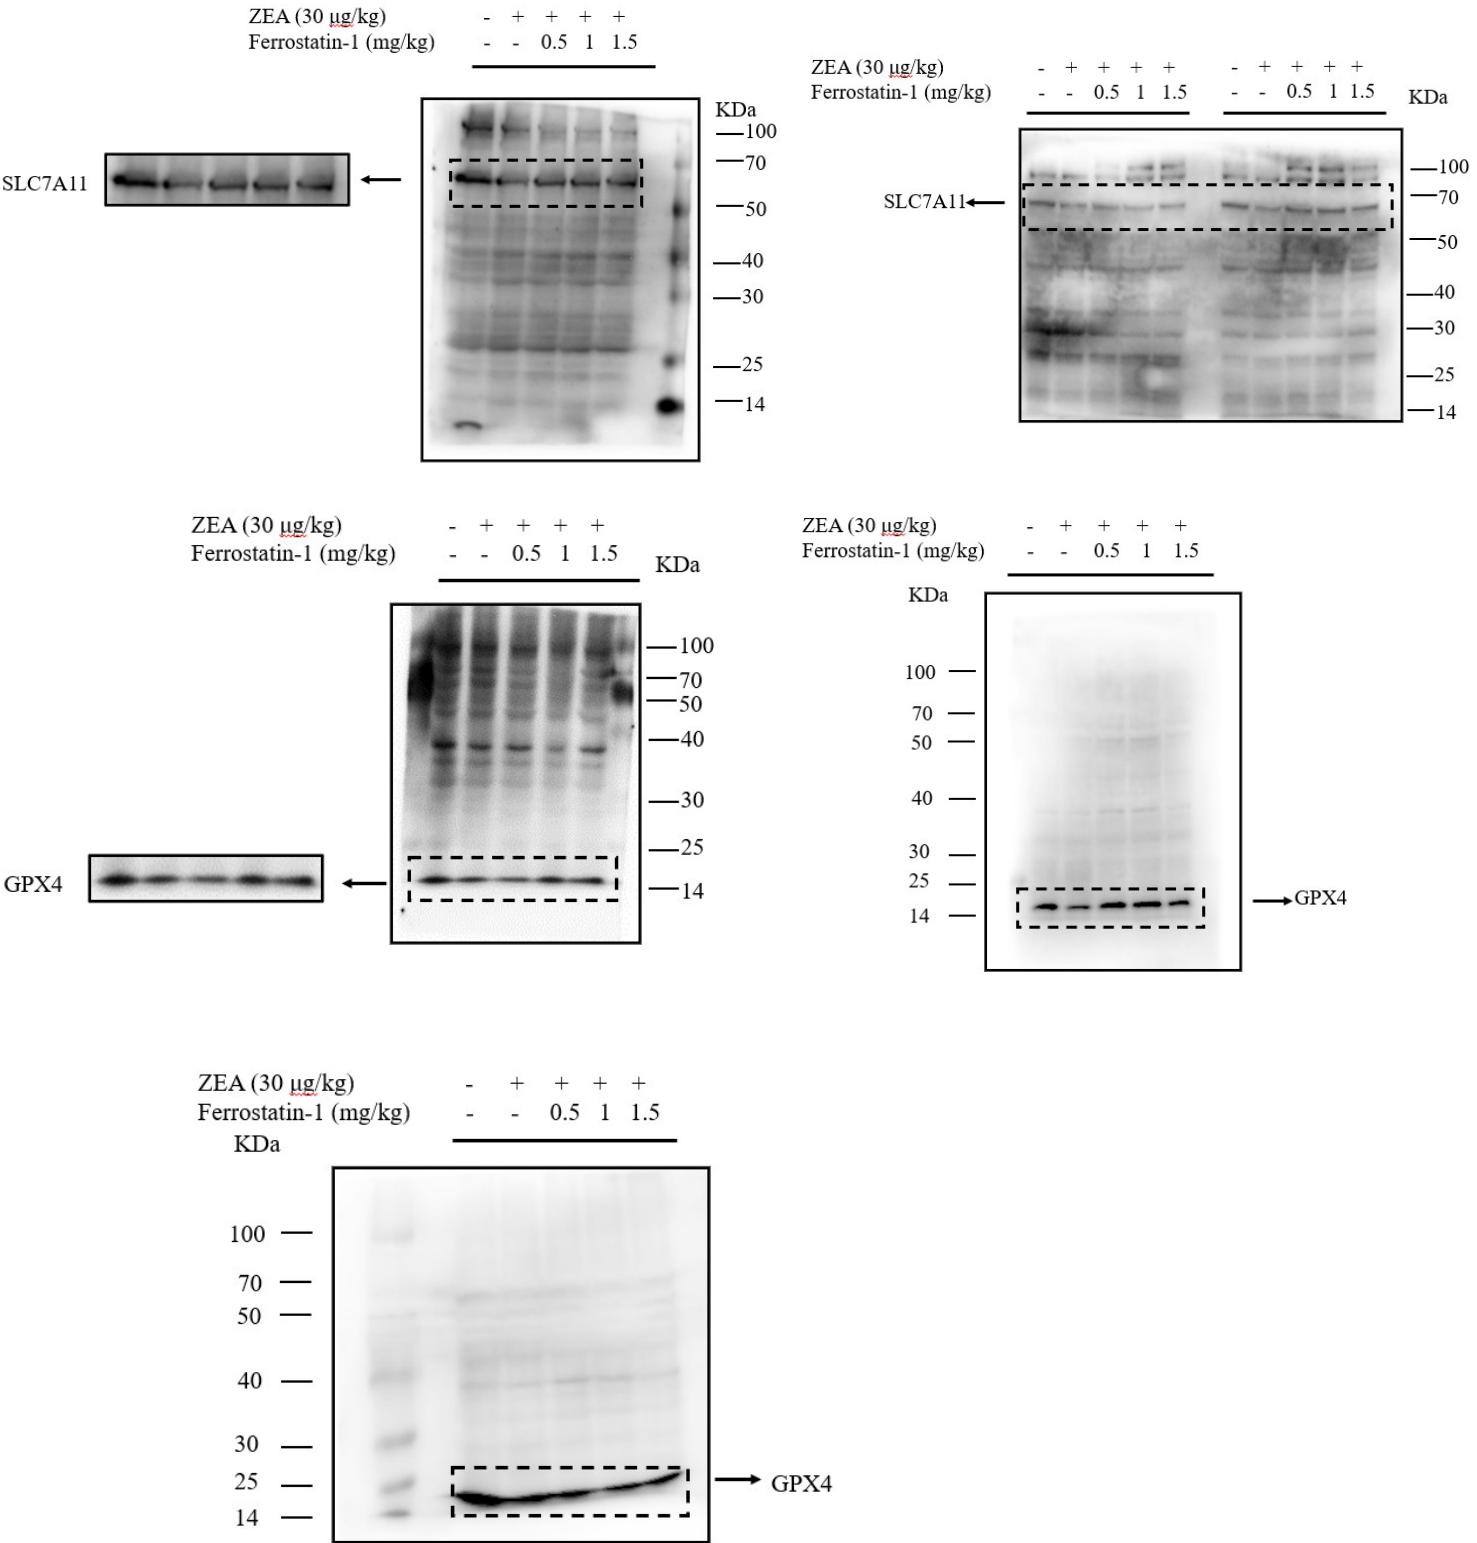

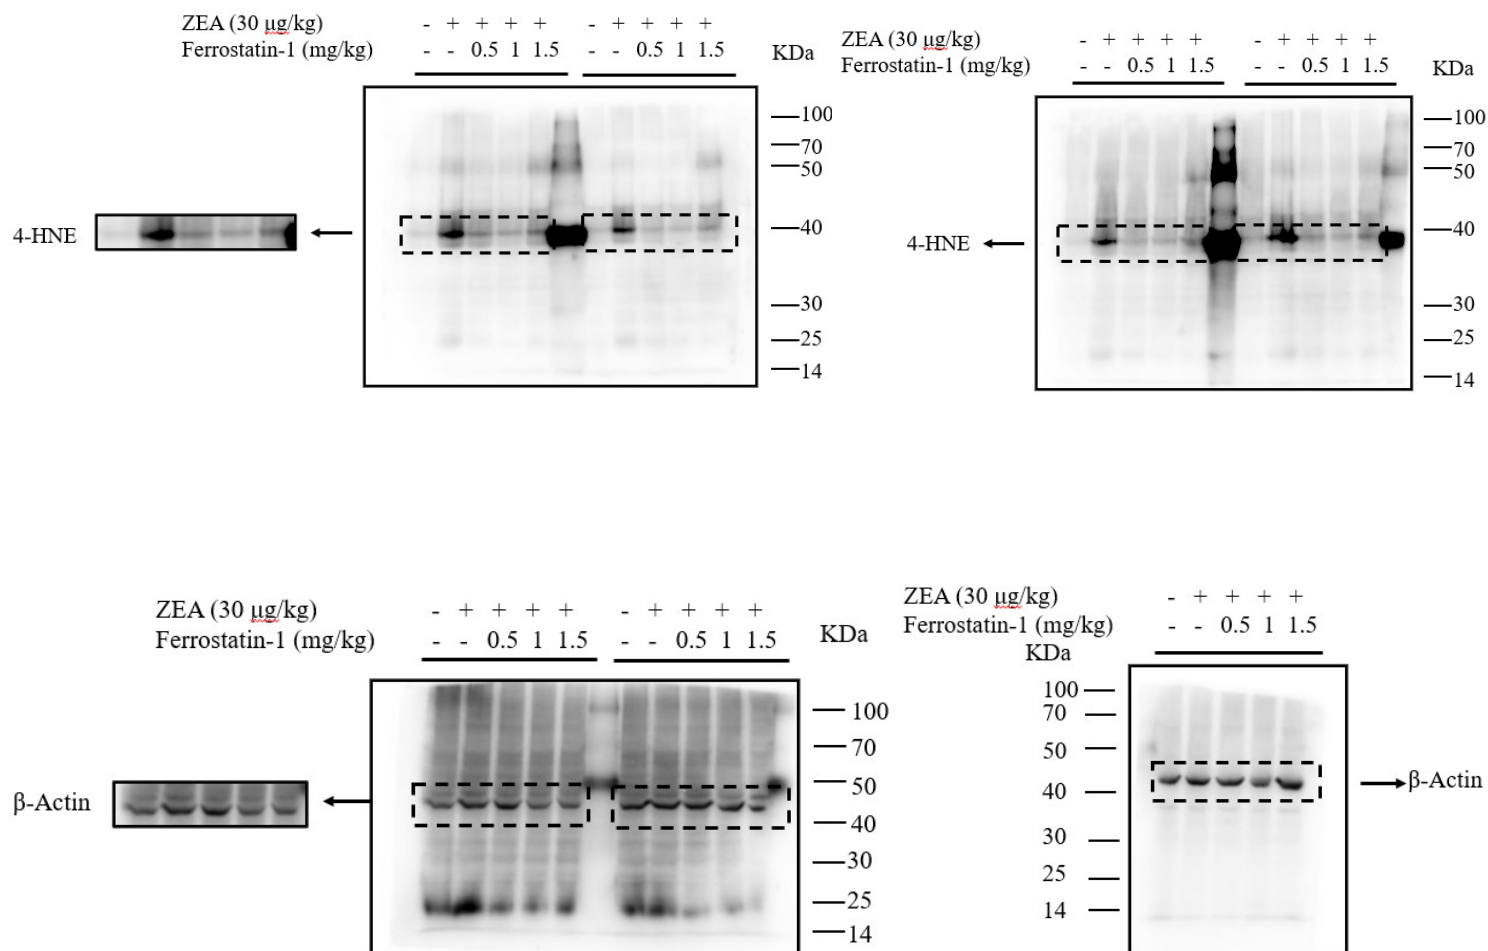

**Figure S3.** Expression changes of SLC7A11, GPX4 and 4-HNE proteins involved in ferroptosis in testis of mice in each group.
